# Supplementary material
Source: PubMed Central journal article supplement (PMC3501220)
Supplement: emboj2012273s1.pdf [file emboj2012273s1.pdf]

## **Supplementary Information**

### **ROS-Mediated Vascular Homeostatic Control of Root-to-Shoot Soil Na Delivery in *Arabidopsis***

Caifu Jiang, Eric Belfield, Aziz Mithani, Anne Visscher, Jiannis Ragoussis, Richard

Mott, J. Andrew C. Smith, Nicholas P. Harberd

## Supplementary Figure 1–3 and Legends

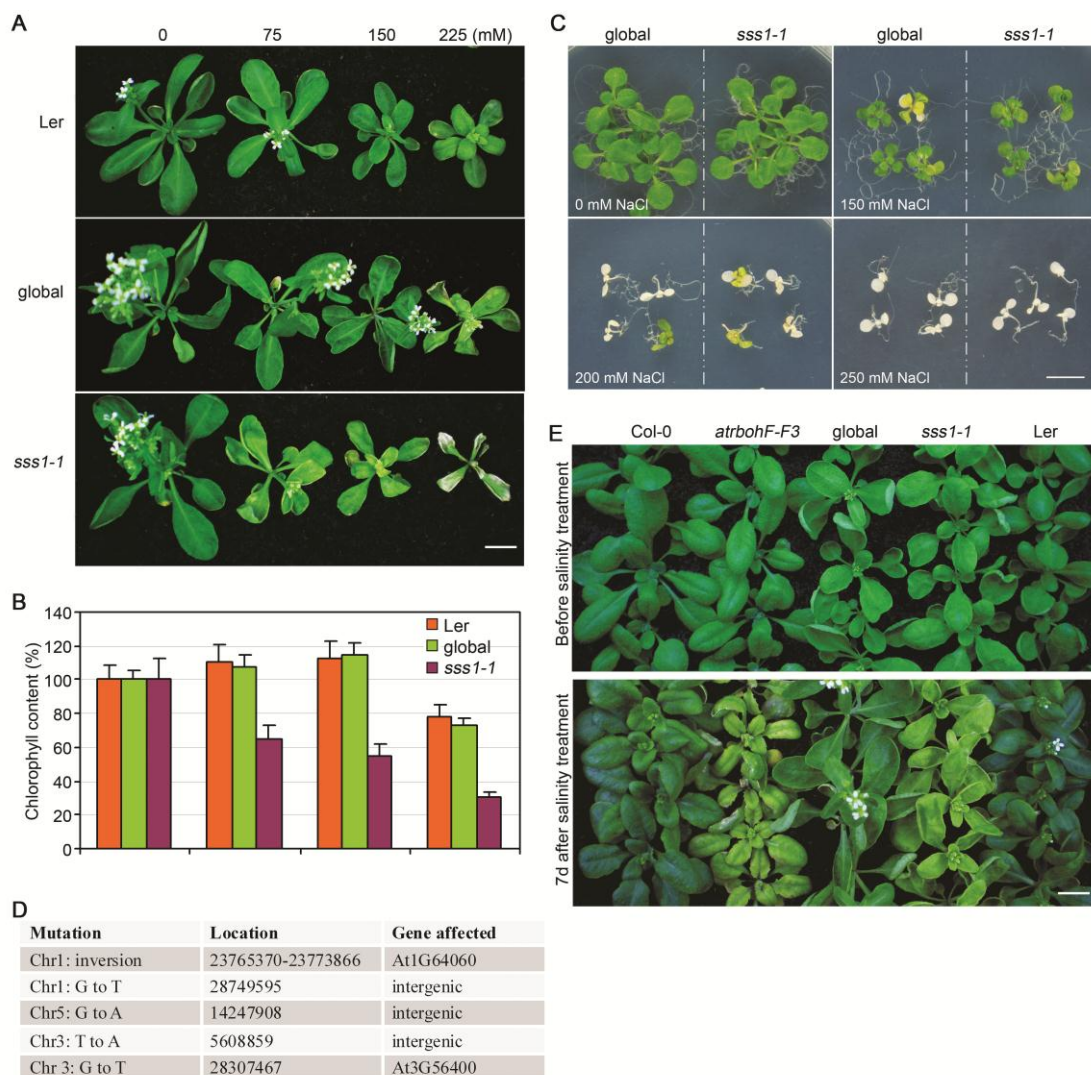

**Supplementary Figure 1** Initial characterization of *sss1-1*. (A–B) Appearance (A) and chlorophyll contents (B) of *A. thaliana* Landsberg *erecta* (Ler; WT), global (progenitor control) and *sss1-1* mutant plants 10 days after salinity treatment (NaCl concentrations as indicated). Plant growth and salinity treatments as described in Figure 1A. Data in (B) are means  $\pm$  SE of three replicates. (C) Appearance of global and *sss1-1* plants 10 days after transfer to agar-based media containing

different concentrations of NaCl in petri dishes (concentrations as indicated). The global progenitor and the *sss1-1* mutant display similar *in vitro* sensitivity to NaCl.

(D) List of mutations detected in *sss1-1* (versus global progenitor) via whole genome sequence analysis (see Materials and Methods). (F) Appearance of soil-grown Col-0, *atrbohF-F3*, global, *sss1-1* and Ler plants before and 7 days following salinity treatment (120 mM NaCl). Bars in A, C and E = 1 cm.

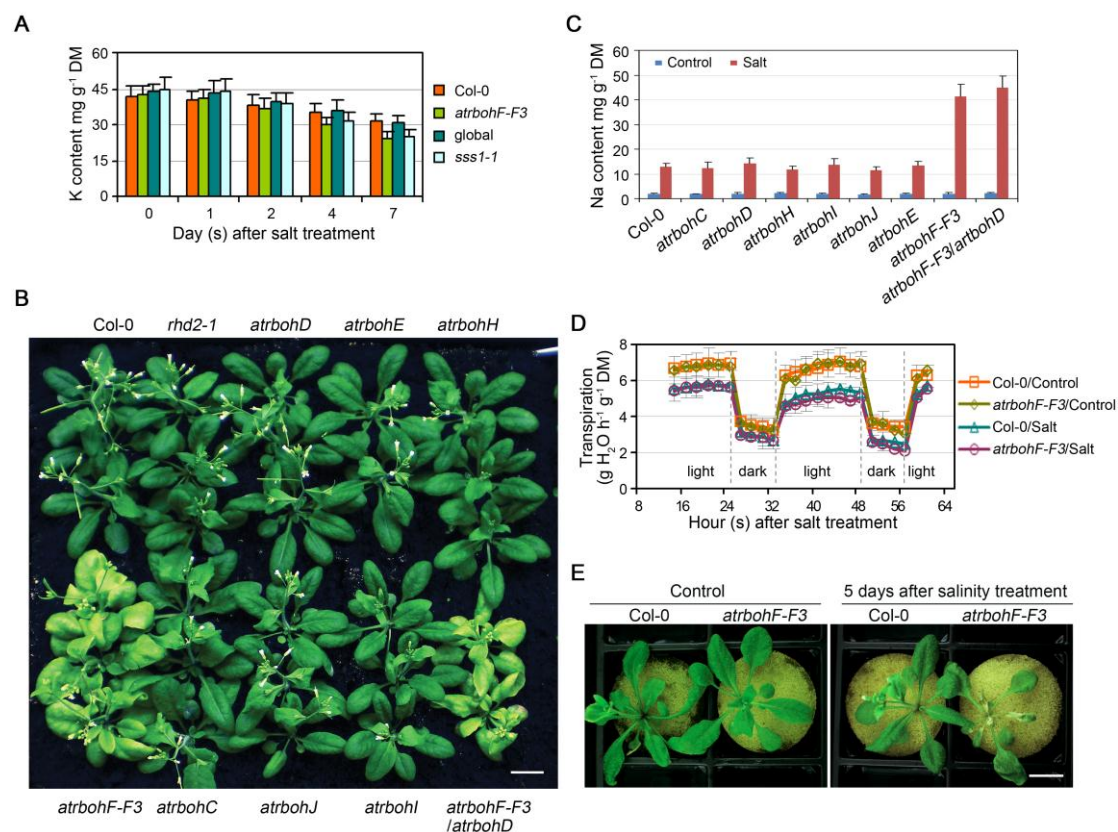

**Supplementary Figure 2** Ion concentrations, transpiration rates and visible phenotypes of salt-treated plants (genotypes and treatments as indicated). (A) K content of shoot samples (genotypes and treatments as indicated; global is WT control for *sss1-1*; Col-0 for *atrbohF-F3*; DM: dry mass). Salt treatment was as described in Figure 1A. Shoot tissue was collected 0-7d following salt treatment to measure K content (see Materials and Methods). (B) Appearance of Col-0 and a variety of different *atrboh* mutants 7 days after salinity treatment (Bar = 1 cm). (C) Shoot Na content of Col-0, *atrbohC*, *atrbohD*, *atrbohH*, *atrbohI*, *atrbohJ*, *atrbohE*, *atrbohF-F3* and *atrbohF-F3/atrbohD* plants grown on control versus saline soil (Salt). Plant

growth and salinity treatment as described in Figure 1A. (D) Comparison of transpiration rates of salt-treated and control WT (Col-0) and *atrbohF-F3* plants over a 48h experimental period (see Materials and Methods). Values are means  $\pm$  SE of at least 8 plants. (E) *atrbohF-F3* displayed a salt hypersensitive phenotype under hydroponic conditions. Photos showed WT (Col-0) and *atrbohF-F3* plants grown in normal hydroponic conditions (Control) or 5 days after salinity treatment (four-week-old plants were treated with 100 mM NaCl). Bar = 1 cm. Data shown in A and C are means  $\pm$  SE of three replicates, and the error bars are standard error of the mean.

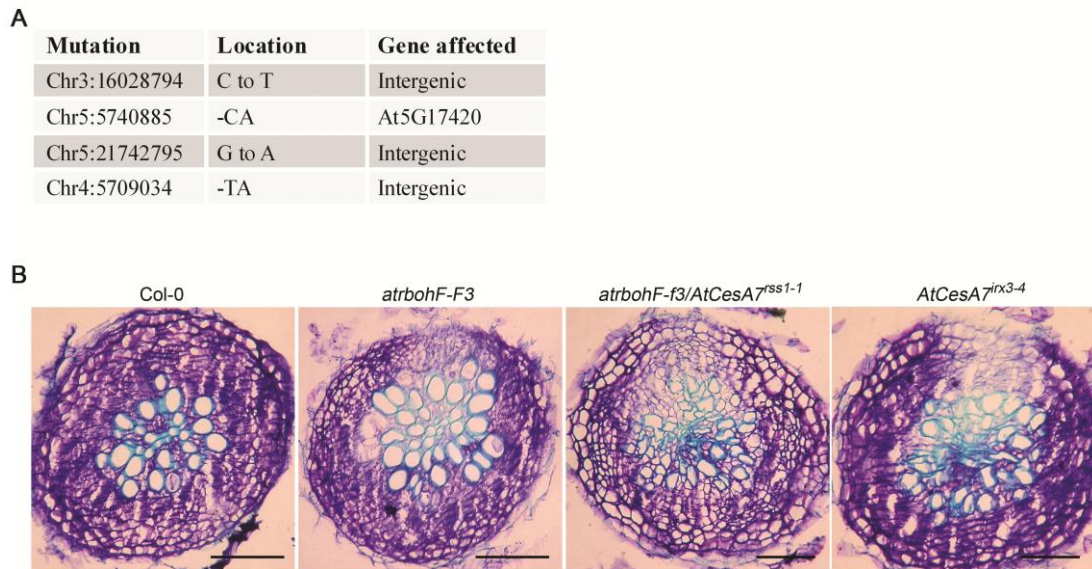

**Supplementary Figure 3.** Characterization of *rss1-1*. (A) Novel mutations detected in *rss1-1* via whole genome sequence analysis (see Materials and Methods). (B) Comparison of the xylem shape of Col-0, *atrbohF-F3*, *atrbohF-F3/AtCesA7<sup>rss1-1</sup>* and *AtCesA7<sup>irx3-4</sup>*. *atrbohF-F3/AtCesA7<sup>rss1-1</sup>* and *AtCesA7<sup>irx3-4</sup>* both show marked reduction in the number of functional conducting root vasculature xylem elements (Bar = 500  $\mu$ m).
